# Supplementary material for: Preparation of Hydrophobic Octadecylphosphonic Acid-Coated Magnetite Nanoparticles for the Demulsification of n-Hexane-in-Water Nanoemulsions
Source: MDPI journal article supplement (doi:10.3390/ma16155367), 2023-07-31
Supplement: s1 [file s1]

## **Supporting Information**

# **Preparation of Hydrophobic Octadecylphosphonic Acid-Coated Magnetite Nanoparticles for the Demulsification of n-Hexane-in-Water Nanoemulsions**

Jiling Liang, Tingting Han, Wenwu Wang, Lunqiu Zhang \*, Yan Zhang

School of Civil Engineering, Liaoning Petrochemical University, Fushun 113001,  
China; lj418@126.com (J.L.); 13478971740@163.com (T.H.);  
lxhwww520@163.com (W.W.); zhangyan\_286192@163.com (Y.Z.)

\* To whom correspondence should be addressed

Tel.: +86 186-4011-9142

E-mail: zhangdoctor2022@126.com

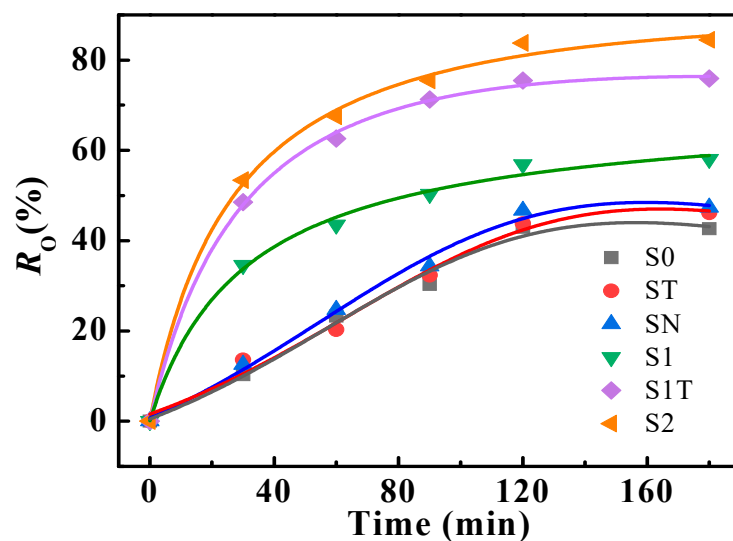

**Figure S1** Plots of demulsification efficiency ( $R_o$ ) vs. time at  $C_s = 40.0 \text{ g} \cdot \text{L}^{-1}$ .

† The effect of time on demulsification efficiency ( $R_o$ ) for magnetic nanoparticles was determined by shaking 0-180 min at  $C_s=40.0 \text{ g L}^{-1}$ . The results show that the  $R_o$  tended to reach an equilibrium value after demulsifying for 120 min. It is indicated that shaking 3 h is sufficient to reach demulsification equilibrium.

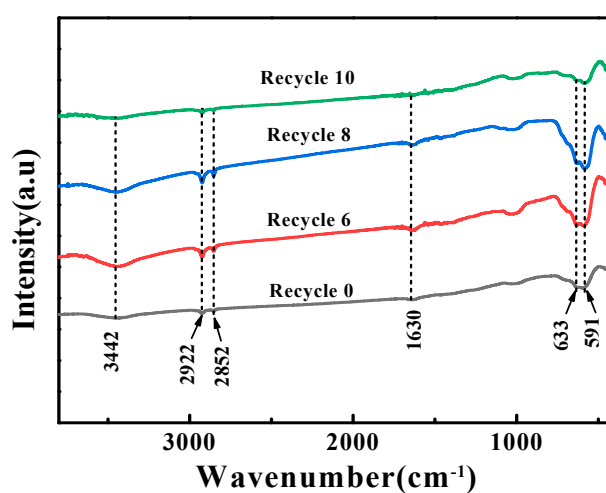

**Figure S2** FT-IR spectra of S2 sample recovered in Recycling tests

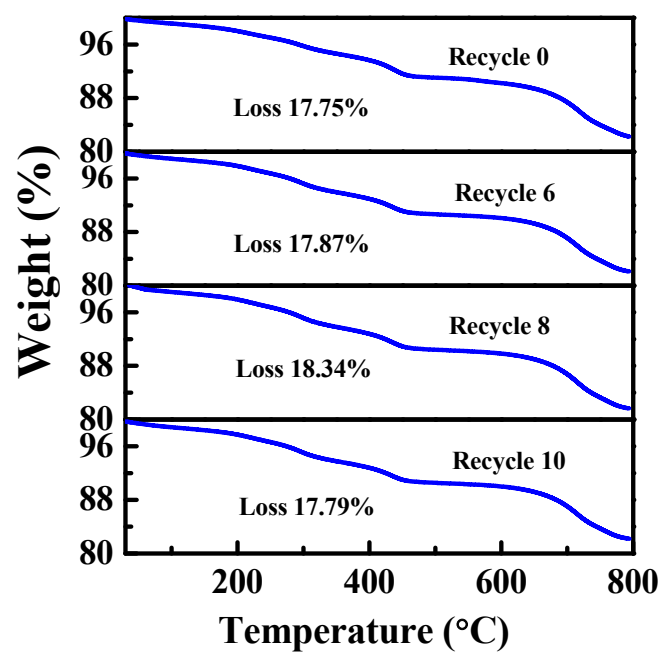

**Figure S3** TG curves of S2 sample recovered in Recycling tests
